# Supplementary material
Source: PubMed Central journal article supplement (PMC6531369)
Supplement: NIHMS1514150-supplement-1.pdf [file NIHMS1514150-supplement-1.pdf]

**Enhanced extracellular vesicle production and ethanol-mediated vascularization bioactivity via a 3D-printed scaffold-perfusion bioreactor system**

Divya B. Patel, Christopher R. Luthers, Max J. Lerman, John P. Fisher, Steven M. Jay

**Supplemental Data**

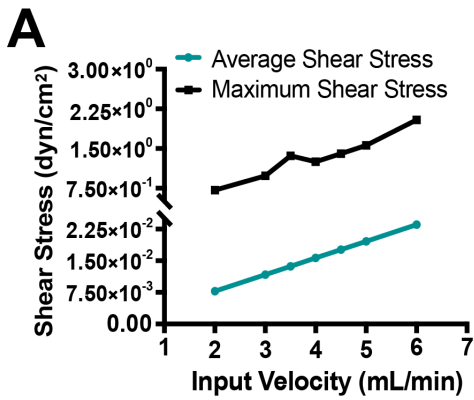

**B**

| Input Velocity (mL/min) | Average Shear Stress (dyn/cm <sup>2</sup> ) | Maximum Shear Stress (dyn/cm <sup>2</sup> ) |
|-------------------------|---------------------------------------------|---------------------------------------------|
| 2                       | 0.008                                       | 0.716                                       |
| 3                       | 0.012                                       | 0.983                                       |
| 3.5                     | 0.014                                       | 1.363                                       |
| 4                       | 0.016                                       | 1.250                                       |
| 4.5                     | 0.018                                       | 1.404                                       |
| 5                       | 0.020                                       | 1.559                                       |
| 6                       | 0.024                                       | 2.042                                       |

**Figure S1.** Computational fluid modeling results of theoretical shear stresses throughout the scaffold (average and maximum) at varying flow rates shown in (A) the graph and (B) the table.

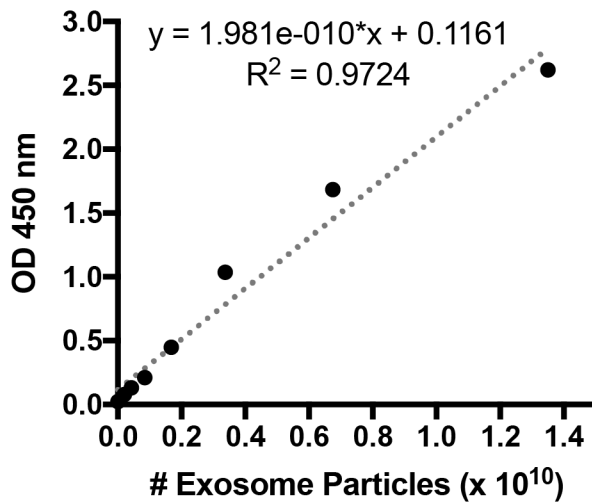

**Figure S2.** Calibration curves for the number of exosome particles versus OD 450 nm reading of exosomal CD63 standard for data shown in Figure 2D. Equation and  $R^2$  for the line of best fit were determined using linear regression analysis.
